# Supplementary material for: Quasi-weekly oscillation of regional PM 2.5 transport over China driven by the synoptic-scale disturbance of the East Asian winter monsoon circulation
Source: Copernicus journal article supplement (doi:10.5194/acp-25-1273-2025), 2025-01-29
Supplement: Supplementary file 1 [file acp-25-1273-2025-supplement.pdf]

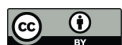

*Supplement of*

## **Quasi-weekly oscillation of regional PM<sub>2.5</sub> transport over China driven by the synoptic-scale disturbance of the East Asian winter monsoon circulation**

**Yongqing Bai et al.**

*Correspondence to:* Tianliang Zhao (tlzhao@nuist.edu.cn) and Kai Meng (macka@foxmail.com)

The copyright of individual parts of the supplement might differ from the article licence.

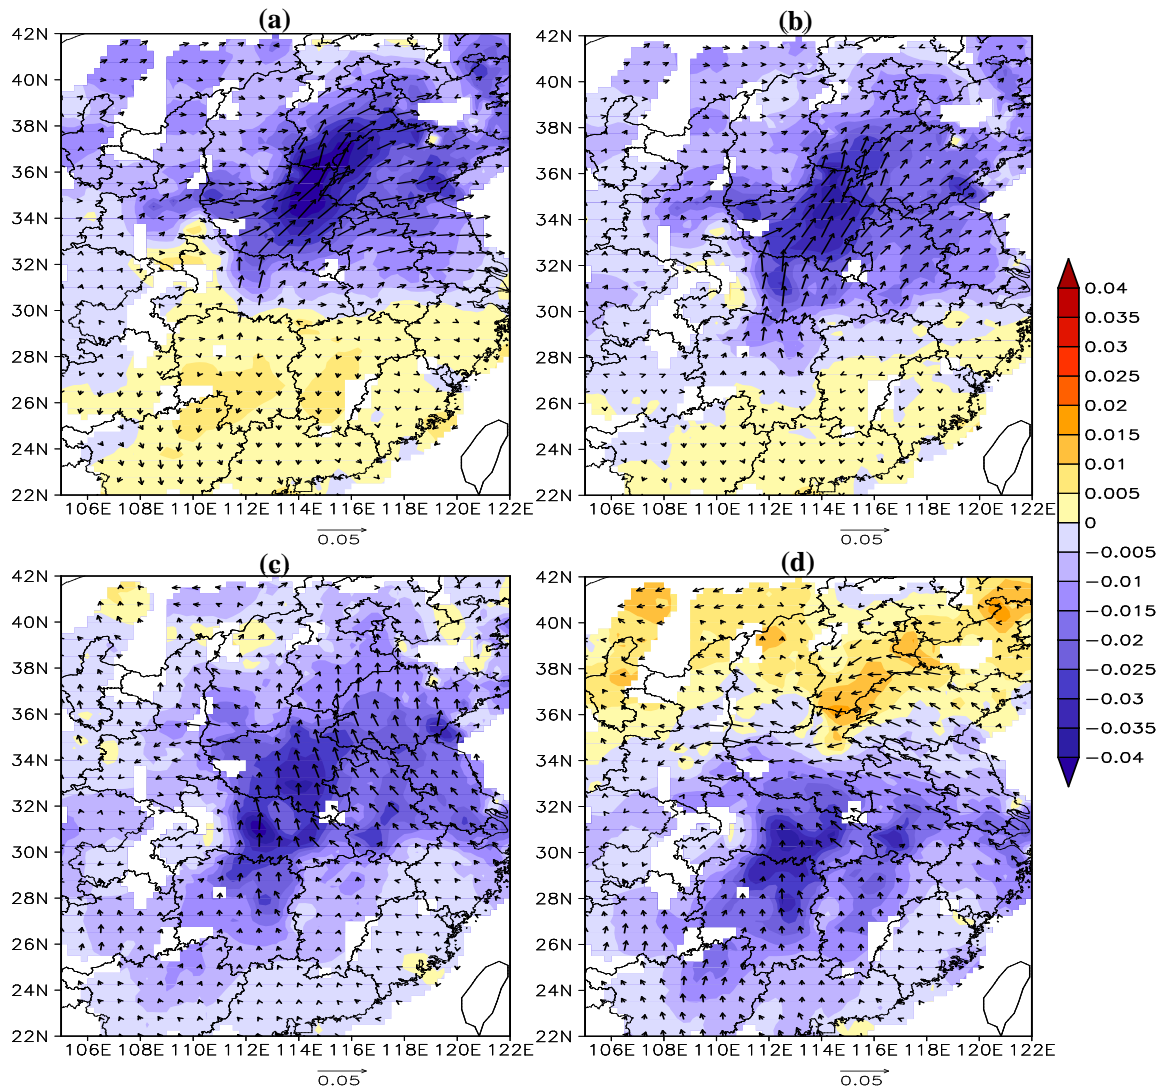

**Figure S1.** Same as Fig. 2. (a)-(d) The last four phases (days) of QWO (8-d) of the regional  $PM_{2.5}$  transport over CEC. The loads of  $PM_{2.5}$  TFM anomalies (color contours, unitless) for EEOF2 and TFM anomalies (vectors, unitless) for EEOF1 with lag time (a) 4 d, (b) 5 d, and loads of TFM anomalies (color contours, unitless) for EEOF3 and TFM anomalies (vectors, unitless) for EEOF2 with lag time (c) 0 d, (d) 1 d over CEC in the winters of 2015-2019.

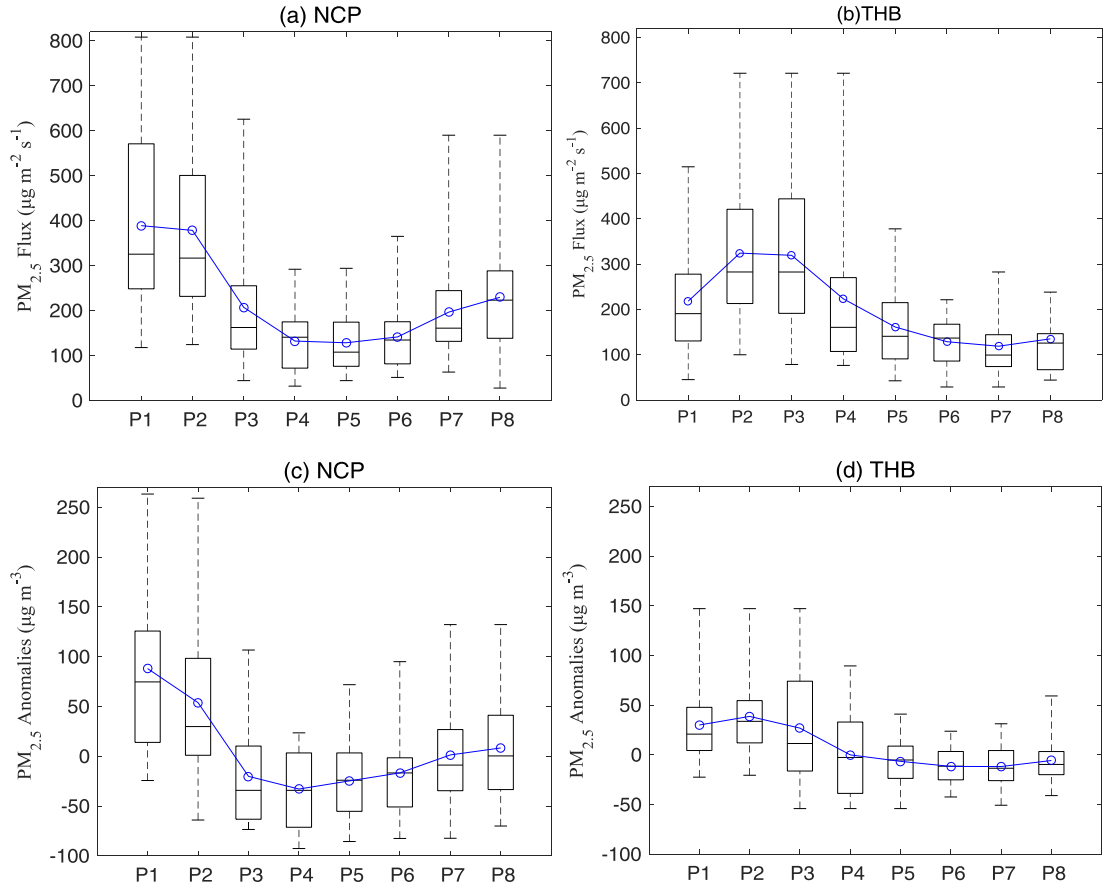

**Figure S2.** Box plots illustrating the 8 phases of QWO during 23 typical events of regional PM<sub>2.5</sub> transport from NCP to THB of (a,b) PM<sub>2.5</sub> TFM ( $\mu\text{g m}^{-2} \text{s}^{-1}$ ) and (c,d) anomalies of PM<sub>2.5</sub> (unit:  $\mu\text{g m}^{-3}$ ); each box plot displays the maximum, minimum, median, and upper and lower quartiles, with the circles indicating the mean.

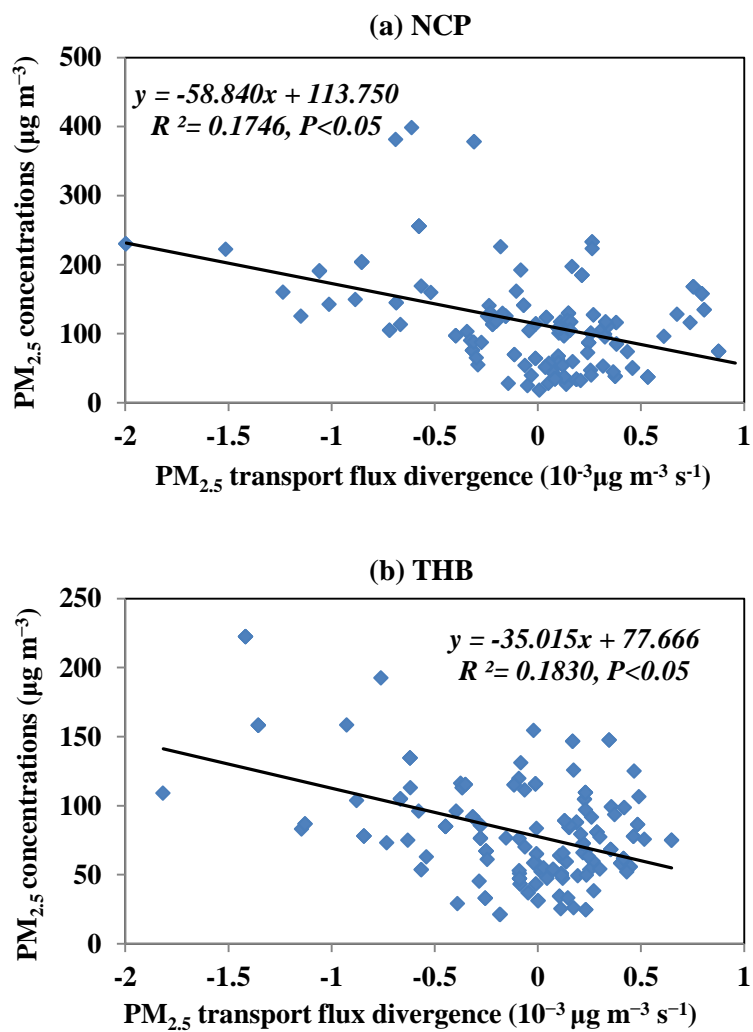

**Figure S3.** Scatter plot of PM<sub>2.5</sub> transport flux divergences and PM<sub>2.5</sub> concentrations over (a) NCP and (b) THB during the 23 typical events of regional PM<sub>2.5</sub> transport over CEC.

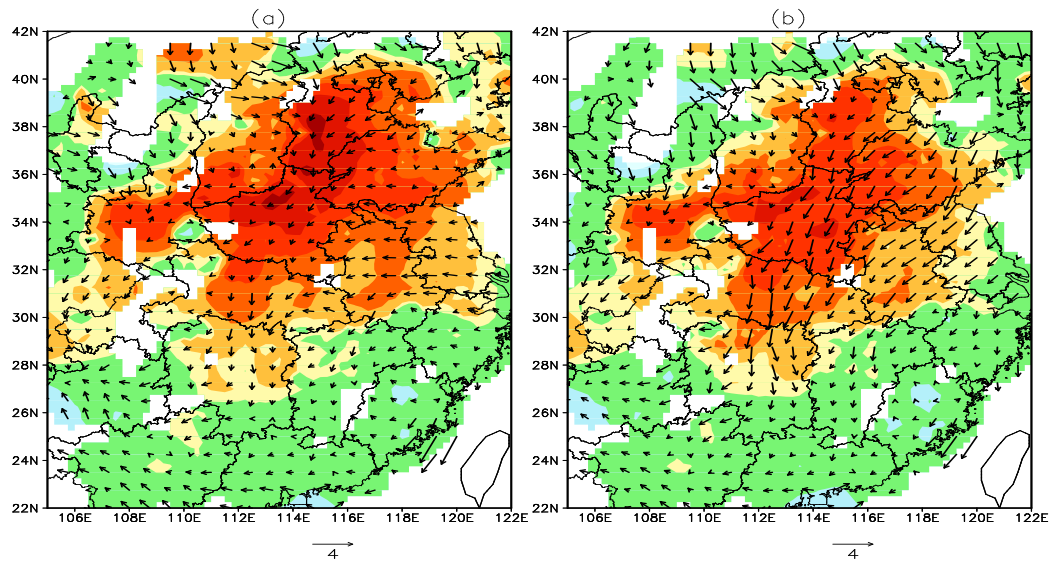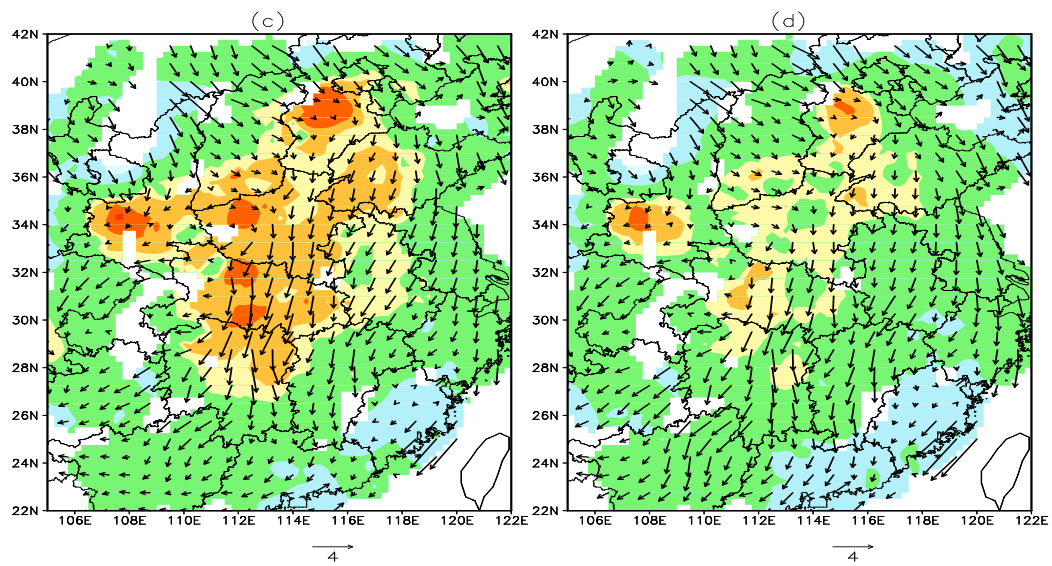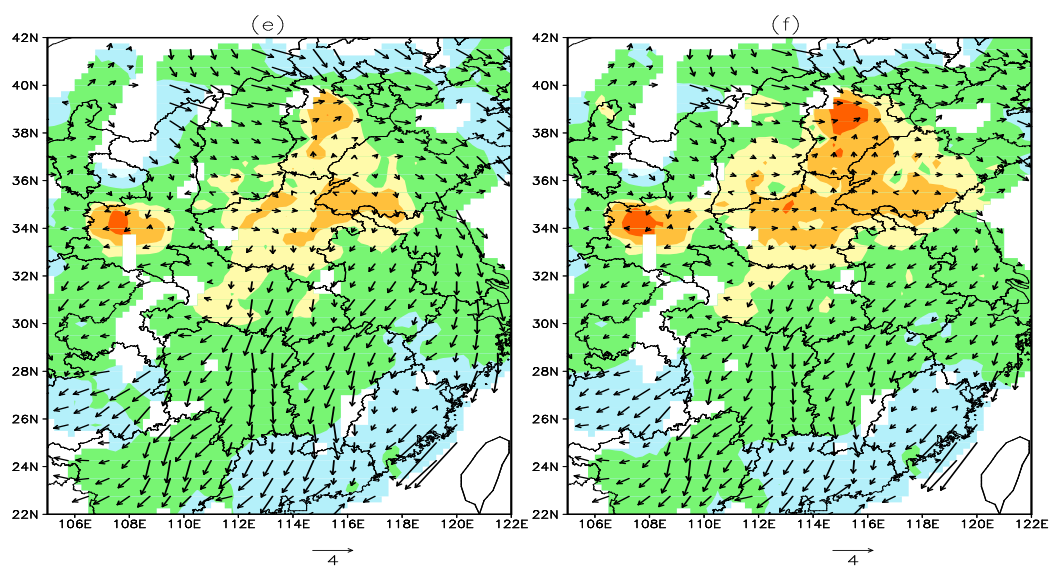

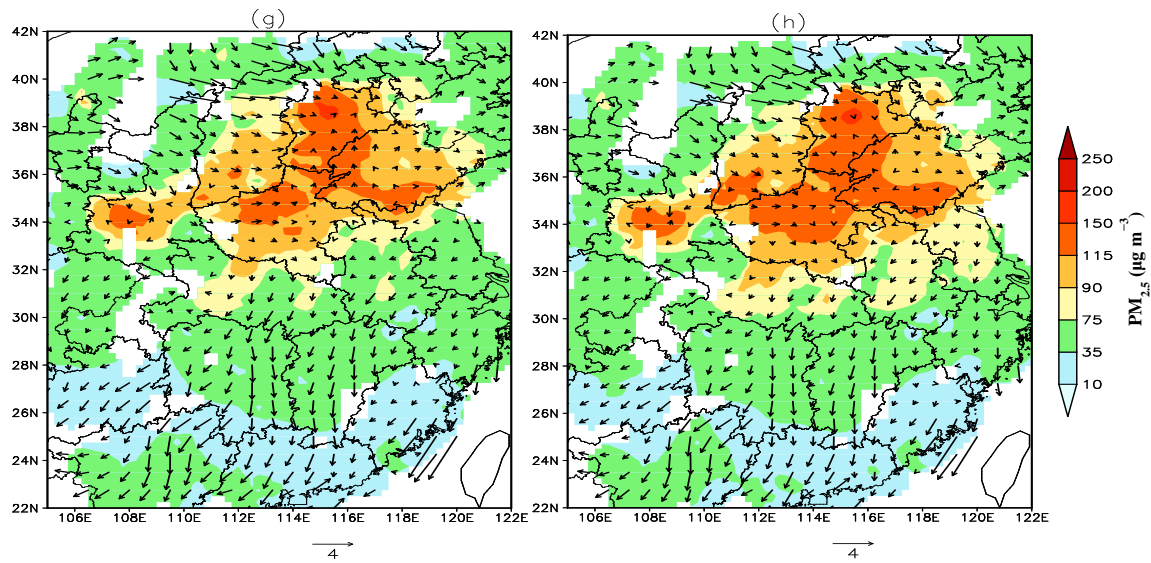

**Figure S4.** The composited PM<sub>2.5</sub> concentrations (color contours, unit:  $\mu\text{g m}^{-3}$ ) and 10-m wind (vector, unit:  $\text{m s}^{-1}$ ) in the 8 phases (a-h) of QWO during the 23 typical events of regional PM<sub>2.5</sub> transport over CEC.

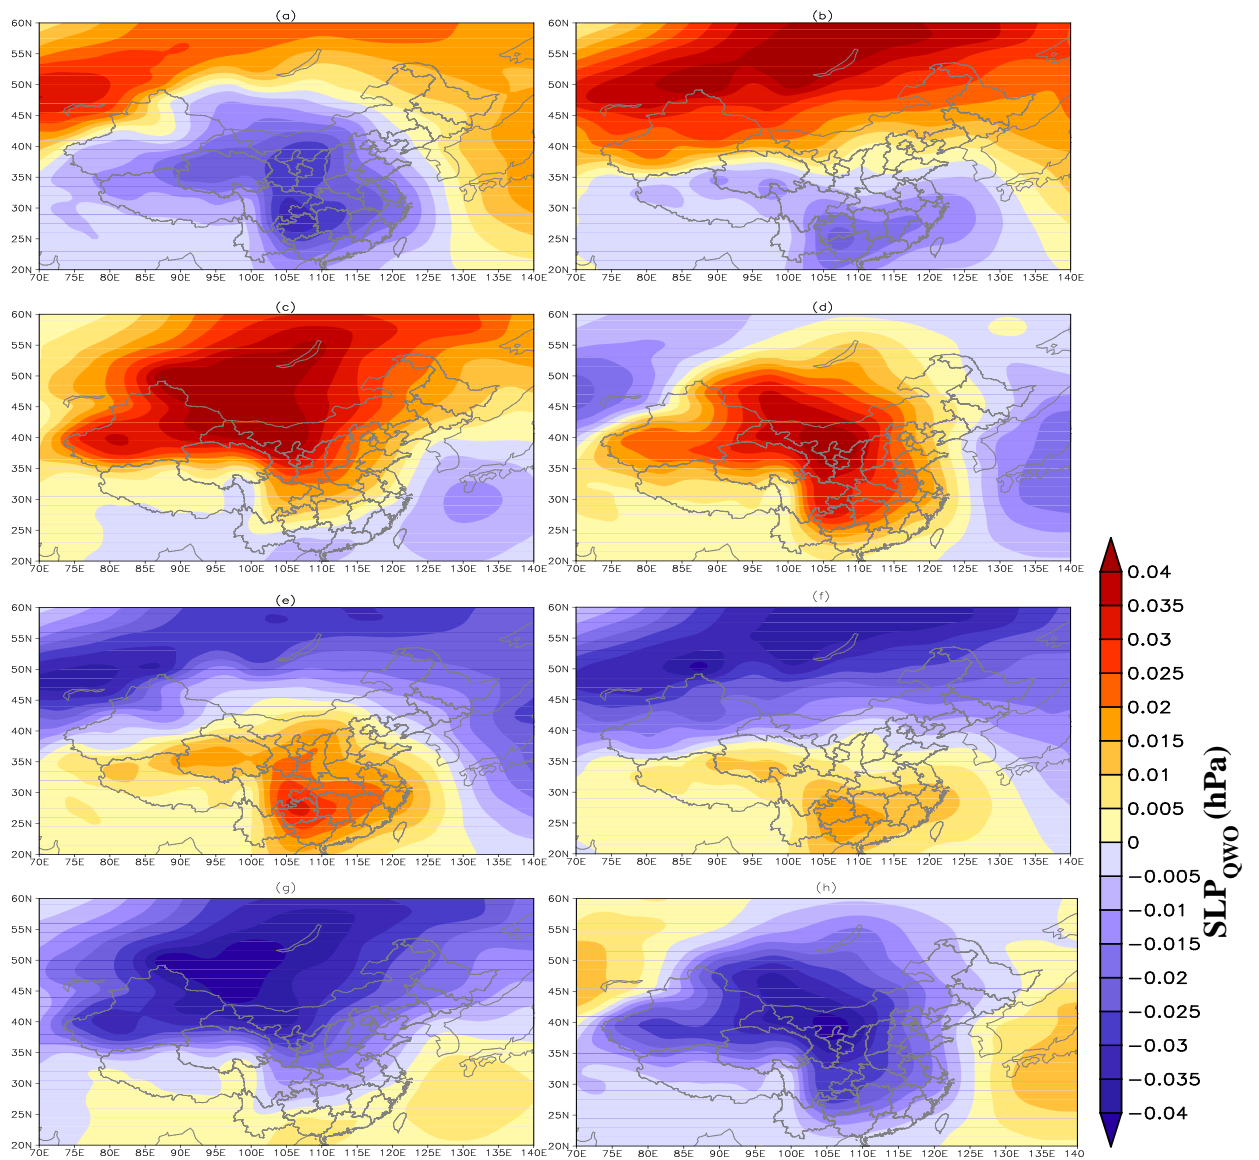

**Figure S5.** EEOF analysis of the  $SLP_{QWO}$  in the winters of 2015-2019, and the 8-d QWO formed by the lag time (a) 1 d, (b) 2 d, (c) 3 d, (d) 4 d, (e) 5 d of its second mode and by the lag time (f) 0 d, (g) 1 d, (h) 2 d of its first mode. The color contours represent the loads of  $SLP_{QWO}$ .
